# Supplementary material
Source: ML conference proceedings conference paper supplement (https://openaccess.thecvf.com/content/CVPR2026/html/Zhang_Reclaiming_Lost_Text_CVPR_2026_paper.html)
Supplement: Supplementary file 1 [file Zhang_Reclaiming_Lost_Text_CVPR_2026_supplemental.pdf]

|     |                                                                |          |
|-----|----------------------------------------------------------------|----------|
| 001 | <b>Appendix</b>                                                |          |
| 002 | <b>Contents</b>                                                |          |
| 003 | <b>A Text Encoder is Better for Cross-Domain Task</b>          | <b>1</b> |
| 004 | A.1. Different Thinking Patterns . . . . .                     | 1        |
| 005 | A.2. How This Difference Influences Cross-                     |          |
| 006 | Domain Tasks . . . . .                                         | 1        |
| 007 | A.3. Experimental Proof . . . . .                              | 2        |
| 008 | A.4. Conclusion and Discussion . . . . .                       | 3        |
| 009 | <b>B. Widespread Occurrence of the Lost Layer</b>              | <b>3</b> |
| 010 | <b>C. Detailed V-T Fusion Module Ablation</b>                  | <b>3</b> |
| 011 | <b>D. Replacing SSM Network</b>                                | <b>3</b> |
| 012 | <b>E. Semantic Information Does Not Cause the Lost</b>         |          |
| 013 | <b>Layer</b>                                                   | <b>4</b> |
| 014 | <b>F. Specific Effects of the VtT Model</b>                    | <b>4</b> |
| 015 | F.1. Enhancing Alignment . . . . .                             | 4        |
| 016 | F.2. More Domain-Independent Features . . . . .                | 4        |
| 017 | F.3. Reclaiming the Lost Layer Information . . . . .           | 5        |
| 018 | <b>G. Extended Results on CDFSL Task</b>                       | <b>5</b> |
| 019 | <b>H. Few Shot Learning Results on Meta-dataset</b>            | <b>5</b> |
| 020 | <b>I. Detailed Implementation Details.</b>                     | <b>5</b> |
| 021 | <b>J. Detailed Related Work</b>                                | <b>7</b> |
| 022 | J.1. Source-Free Cross-domain Few shot Learning                | 7        |
| 023 | J.2. Parameter-Efficient Fine-Tuning . . . . .                 | 7        |
| 024 | J.3. Layer Redundancy . . . . .                                | 7        |
| 025 | <b>K. Broader Impact</b>                                       | <b>7</b> |
| 026 | <b>A. Text Encoder is Better for Cross-Domain</b>              |          |
| 027 | <b>Task</b>                                                    |          |
| 028 | In the main text, we described the discovery of the lost layer |          |
| 029 | and proposed the VtT model to address this issue. In this      |          |
| 030 | section, we provide additional insights into our previous      |          |
| 031 | findings and the design of our method. We conducted an         |          |
| 032 | in-depth comparison between the text encoder and the vi-       |          |
| 033 | sion encoder of CLIP, examining their differences and their    |          |
| 034 | impact in cross-domain scenarios.                              |          |
| 035 | <b>A.1. Different Thinking Patterns</b>                        |          |
| 036 | We examined the attention distribution corresponding to the    |          |
| 037 | CLS/EOS token in each layer of the CLIP’s vision and text      |          |
| 038 | encoder, as illustrated in Figure 1a and 1c. We have two       |          |
| 039 | discoveries: (1) In the vision encoder, shallow layers focus   |          |

on specific semantic parts, while deeper layers shift to focusing on a small number of background non-semantic tokens. (2) In the text encoder, shallow layers concentrate on contextual content, whereas deeper layers shift to focusing on semantically rich category tokens.

We also quantitatively demonstrated this phenomenon. We measured the attention weight ratio of category tokens to all text tokens in each layer of the text encoder, as depicted by the red line in Figure 1d. The attention weight of the EOS token to category tokens in shallow layers is nearly zero, indicating that these blocks predominantly focus on context rather than task-relevant semantic information. As the layers deepen, this attention ratio increases, with over 60% of attention in the final layers directed towards aggregating category-related token information. Similarly, in the vision branch, we tracked the attention weight of the top 10 tokens with the highest attention in the final layer across all layers, shown by the red line in Figure 1b. As the layers deepen, these top 5% tokens capture approximately 60% of the attention score.

## A.2. How This Difference Influences Cross-Domain Tasks

An intuitive hypothesis is that a text encoder model, which focuses more on semantic information in the final layers, should extract more domain-independent features. For instance, the phrases “a photo of a dog” and “a photo of a cartoon dog” should emphasize the semantic information “dog” thereby mitigating the impact of domain-specific information like “cartoon”. To validate this hypothesis, we measured the similarity of text and visual features from different layers of the encoder for the same category but from different domains on ImageNet-R. We use different templates containing domain information to simulate cross-domain conditions in the text branch, such as “a cartoon photo of a dog” and “a photo of a painting-style dog”. The results are shown by the blue line in Figure 1b and 1d.

In Figure 1d, the similarity of text features containing different domain information declines in the initial layers but increases in the final layers, supporting our hypothesis. The text encoder in the final layers (believed to emphasize classification tasks) stresses category-related semantic information. Consequently, the similarity of text descriptions with the same semantics but different domain information increases in these layers. The final extracted text characteristics, which are **dominated by semantic information, are less sensitive to domain differences**. The similarity between text features of the same category but different domains remains above 0.9, indicating that the text encoder extracts domain-independent features.

Conversely, the vision encoder reduces its focus on semantic parts in the final layers and shifts attention to a small number of background tokens (Figure 1b, red line). The

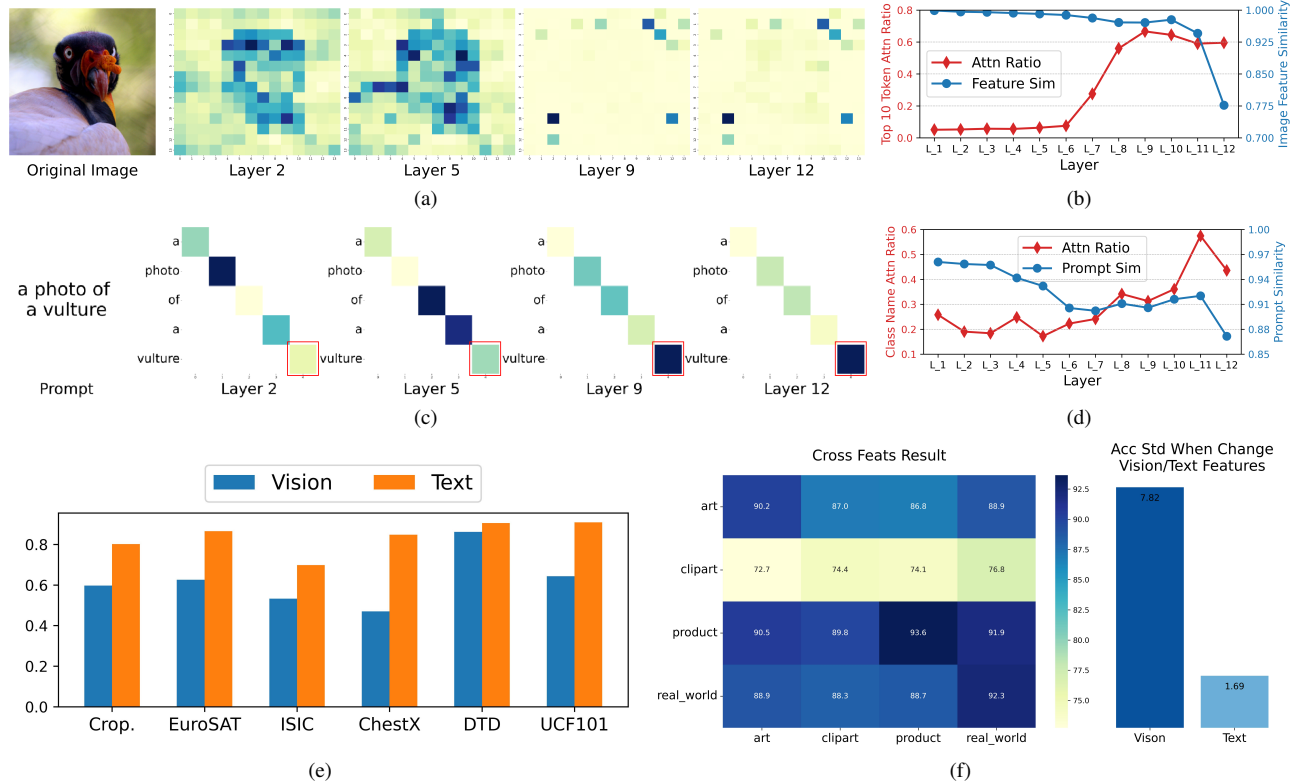

Figure 1. (a) The attention distribution across different layers of the vision encoder. (b) The red line quantitatively shows the attention weight percentage of the top 10 tokens with the highest attention weights in each layer, while the blue line shows the similarity of features extracted by different layers of the vision encoder for visual samples from different domains but of the same category. A higher similarity indicates more domain-independent features. (c) Visualization of the attention weight distribution across different layers of the text encoder. (d) The red line quantitatively shows the attention weight percentage of the category name token in each layer of the text encoder, while the blue line shows the similarity of features extracted by different layers of the text encoder for textual descriptions with different domain information but containing the same category name. A higher similarity indicates more domain-independent features. (e) Domain distance between visual features and text features extracted by the CLIP model when transferred from the ImageNet dataset (source domain) to downstream cross-domain datasets. (f) Cross-domain transfer experiments of visual and textual features from different domains.

092 similarity between features of the same category but dif- 110  
 093 ferent domains is nearly 1 in the initial layers but signifi- 111  
 094 cantly decreases in the final layers. This indicates that the 112  
 095 vision encoder’s “domain-sensitive” approach in the final 113  
 096 layers amplifies the impact of domain differences, result- 114  
 097 ing in a similarity of around 0.77, much lower than the text 115  
 098 encoder’s 0.9. 116

### 099 A.3. Experimental Proof 117

100 We also conducted specific experiments to demonstrate that, 118  
 101 compared to the vision encoder, the text encoder in CLIP 119  
 102 contains more domain-independent information, making it 120  
 103 easier to transfer to cross-domain tasks. 121

104 We utilized the CKA [22] (Centered Kernel Alignment) 122  
 105 similarity metric to measure domain distance between vi- 123  
 106 sual features and text features extracted by the CLIP model 124  
 107 when transferred from the ImageNet dataset (source do- 125  
 108 main) to downstream cross-domain datasets. A higher CKA 126  
 109 similarity indicates a smaller domain distance, suggesting 127

110 that the encoder contains less domain-specific information. 110  
 111 As shown in Figure 1e, the CKA metric for text features is 111  
 112 consistently higher than that for visual features across all 112  
 113 downstream datasets, indicating that the text encoder ex- 113  
 114 tracts more domain-independent text features. 114

115 To further demonstrate the robustness of the text encoder 115  
 116 against domain information, we conducted cross-domain 116  
 117 experiments with visual and text features. We selected the 117  
 118 Office-Home dataset [42], which contains category names 118  
 119 and visual images of the same categories from four dif- 119  
 120 ferent domains. Using LoRA, we fine-tuned the vision 120  
 121 and text branches separately on the datasets from the four 121  
 122 domains, recorded the resulting visual and text features, 122  
 123 and performed cross-combination CLIP classification tasks. 123  
 124 The results, shown in Figure 1f, indicate that when we fix 124  
 125 the visual features (vertical axis) and vary the text features 125  
 126 (horizontal axis), the performance change is minimal. This 126  
 127 implies that the text features extracted from different do- 127

Table 1. In various backbone versions of the CLIP model, masking a specific layer of the text encoder can lead to significant performance improvements in zero-shot SF-CDFSL tasks.

| Backbone  | CropDisease |                      | EuroSAT |                      | ISIC |                      | ChestX |                      |
|-----------|-------------|----------------------|---------|----------------------|------|----------------------|--------|----------------------|
|           | Full        | Masked               | Full    | Masked               | Full | Masked               | Full   | Masked               |
| VIT-RN50  | 34.7        | 37.8 <sup>+3.1</sup> | 38.0    | 39.4 <sup>+1.4</sup> | 24.7 | 28.1 <sup>+3.4</sup> | 19.9   | 20.1 <sup>+0.2</sup> |
| VIT-RN101 | 34.1        | 35.6 <sup>+1.5</sup> | 38.1    | 40.3 <sup>+2.2</sup> | 27.6 | 27.7 <sup>+0.1</sup> | 19.6   | 20.0 <sup>+0.4</sup> |
| VIT-B16   | 39.8        | 44.0 <sup>+4.2</sup> | 54.8    | 63.2 <sup>+8.4</sup> | 27.3 | 29.2 <sup>+1.9</sup> | 21.8   | 21.9 <sup>+0.1</sup> |
| VIT-L14   | 52.2        | 55.2 <sup>+3.0</sup> | 69.7    | 71.2 <sup>+1.5</sup> | 27   | 29.8 <sup>+2.8</sup> | 21.7   | 22.5 <sup>+0.8</sup> |

Table 2. When employing different PEFT methods for 5-way 1-shot SF-CDFSL tasks, training after removing a specific layer of the text encoder can achieve better performance compared to using the complete text encoder.

| Method      | CropDisease |                      | EuroSAT |                      | ISIC |                      | ChestX |                      |
|-------------|-------------|----------------------|---------|----------------------|------|----------------------|--------|----------------------|
|             | Full        | Masked               | Full    | Masked               | Full | Masked               | Full   | Masked               |
| Lora-Vision | 82.5        | 85.0 <sup>+2.5</sup> | 81.8    | 82.4 <sup>+0.6</sup> | 35.4 | 36.3 <sup>+0.9</sup> | 21.5   | 21.8 <sup>+0.3</sup> |
| Lora-Text   | 83.1        | 83.3 <sup>+0.2</sup> | 74.1    | 74.6 <sup>+0.5</sup> | 34.4 | 34.5 <sup>+0.1</sup> | 21.4   | 22.2 <sup>+0.8</sup> |
| Lora-Both   | 84.3        | 84.6 <sup>+0.3</sup> | 81.4    | 82.9 <sup>+1.5</sup> | 33.6 | 34.3 <sup>+0.7</sup> | 22.4   | 22.7 <sup>+0.3</sup> |
| Maple       | 81.8        | 82.6 <sup>+0.8</sup> | 76.5    | 77.2 <sup>+0.7</sup> | 33.6 | 33.8 <sup>+0.2</sup> | 21.3   | 22.2 <sup>+0.9</sup> |

mains are relatively consistent and have good transferability. Conversely, when we fix the text features and vary the visual features (viewed from top to bottom), the performance varies significantly, indicating that the visual features learned from different domains are vastly different and less transferable. The right part of Figure 1f illustrates the standard deviation in classification accuracy as visual and text features change.

#### A.4. Conclusion and Discussion

Through our analysis, we found that compared to the vision encoder, the text encoder in CLIP: (1) operates in a semantically-driven manner, making it less sensitive to domain information, and (2) its information transfers better to cross-domain tasks. These findings further validate our proposed idea of “teaching the vision encoder to think like the text encoder”, emphasizing its significance and necessity in cross-domain scenarios.

#### B. Widespread Occurrence of the Lost Layer

We find that the phenomenon of shortcut layers is prevalent in CLIP of different backbones, as shown in Table 1. Moreover, this phenomenon persists even after fine-tuning with a few samples, as seen in Table 2. It is evident that removing a certain layer from the text encoder (Masked) consistently improves classification performance across four cross-domain few-shot datasets.

#### C. Detailed V-T Fusion Module Ablation

Additionally, we demonstrate the performance of various methods for integrating the outputs of the text encoder and visual encoder to highlight the rationality and effectiveness

Table 3. Further ablation study for V-T Fusion module on 5-way 1-shot task.

| Method            | Crop. | EuroSAT | ISIC | ChestX | Avg  |
|-------------------|-------|---------|------|--------|------|
| <b>V-T Fusion</b> | 87.0  | 85.0    | 38.2 | 22.7   | 58.2 |
| V-T Fusion(R.)    | 86.2  | 84.5    | 38.1 | 22.2   | 57.7 |
| V-T Fusion(2D)    | 86.9  | 84.7    | 38.4 | 22.7   | 58.2 |
| V Fusion          | 86.0  | 83.4    | 37.3 | 21.8   | 57.1 |
| T Fusion          | 86.2  | 83.9    | 37.9 | 22.1   | 57.5 |
| V-T Mean          | 85.9  | 83.5    | 36.9 | 21.6   | 57.0 |
| T Mean            | 85.7  | 83.5    | 37.5 | 21.7   | 57.1 |
| V Mean            | 85.8  | 83.6    | 37.3 | 21.5   | 57.0 |

Table 4. Ablation study for SSM network.

| Method            | Crop. | Euro. | ISIC | ChestX | Avg  |
|-------------------|-------|-------|------|--------|------|
| <b>SSM (OURS)</b> | 87.0  | 85.0  | 38.2 | 22.7   | 58.2 |
| MH Attention      | 85.3  | 84.2  | 37.3 | 22.1   | 57.2 |
| RNN               | 85.9  | 83.9  | 36.9 | 22.2   | 57.2 |
| LSTM              | 85.8  | 84.3  | 37.6 | 22.1   | 57.4 |

of our V-T Fusion module. First, we compare the performance of different scanning strategies used in the V-T Fusion module to generate  $L_i$ , as shown in the first three rows of Table 3. Our approach, V-T Fusion, uses a deep-to-shallow scanning strategy. In contrast, V-T Fusion(R.) represents the reverse, using a shallow-to-deep scanning strategy. V-T Fusion(2D) involves scanning in both directions, with both sequences fed into the subsequent SSM network, and their outputs combined. As shown, V-T Fusion achieves the best performance. Although V-T Fusion(2D) yields similar results, considering computational complexity, we opt for the single-scan V-T Fusion method.

We also compare other methods of integrating visual and text features from each layer, with results shown in rows 4 to 8 of Table 3. T Fusion and V Fusion denote learning with only the text output and visual input, respectively, into the SSM network. V-T Mean, T Mean, and V Mean denote averaging the outputs of all layers from both branches, only the text branch, and only the visual branch, respectively. It is evident that none of these methods outperform our proposed V-T Fusion approach.

#### D. Replacing SSM Network

In the V-T Fusion module, we use the SSM network to serialize and fuse information from the visual-text feature sequences (see Equation 8 in the main text). In this section, we further evaluate the performance of other methods that replace the SSM network. The comparison methods mainly fall into two categories: the first category includes sequential modeling methods such as RNN [54] and LSTM [34]. The second category includes attention mechanism networks like Multi-Head Attention [41]. The results

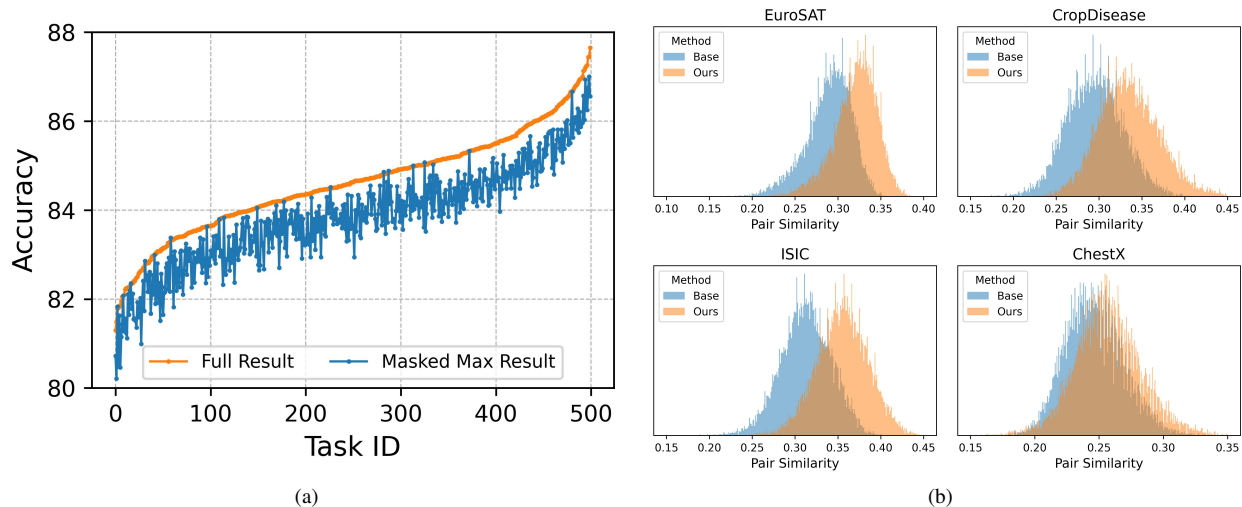

Figure 2. (a) In the source domain (ImageNet), performance on sampled sub-tasks containing 100 different categories shows that optimal performance is almost always achieved using the complete text encoder, suggesting that the category composition is not the cause of the shortcut layer. (b) Cosine similarity between the visual features and the corresponding textual features extracted by the model before and after applying our method.

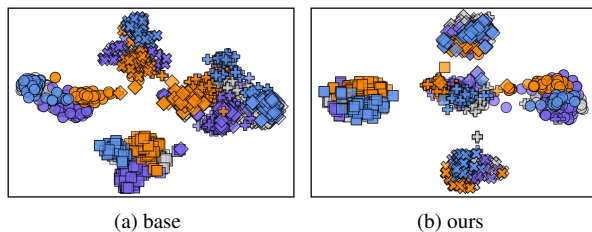

Figure 3. t-SNE [30] visualization results for the ImageNet-R [13] (5 classes: glodfish, hammerhead shark, tiger shark, stingray and hen). Different colors denote samples from different domain, and different shapes indicate samples of different classes.

188 are shown in Table 4. It can be seen that none of these meth-  
189 ods outperforms the SSM network used by us.

## 190 E. Semantic Information Does Not Cause the 191 Lost Layer

192 The results in Figure 2(d) of the main text demonstrate that  
193 changes in the visual domain are the primary factor causing  
194 the lost layer. To further confirm that category information  
195 is not the primary factor for the shortcut layer phenomenon,  
196 we sampled 100 categories from ImageNet each time to create  
197 500 sub-tasks, each containing different category informa-  
198 tion. We recorded the classification performance of using  
199 the full text encoder (Full Result) and best performance  
200 achieved after removing a specific layer from the text en-  
201 coder (Masked Max Result). The results, as depicted in  
202 Figure 2a, indicate that the shortcut layer phenomenon is  
203 absent in nearly all sub-tasks on ImageNet.

## F. Specific Effects of the VtT Model

The results in Figure 1(c) of the main text demonstrate that  
the lost layer disappears when our method is applied, indicat-  
ing that our approach effectively leverages the informa-  
tion from the text encoder. We further elucidate the impact  
of our method through additional experiments.

### F.1. Enhancing Alignment

Firstly, we measure the cosine similarity between the visual  
features and the corresponding textual features extracted by  
the model before and after applying our method. The re-  
sults, shown in Figure 2b, indicate that our method increase  
the similarity between the visual and text features, enhanc-  
ing cross-modal alignment.

### F.2. More Domain-Independent Features

We also visualized the features extracted by the model for  
images from five categories within the ImageNet-R dataset,  
across different domains, before and after applying our  
method. The results are presented in Figure 3. In these  
visualizations, colors represent the domains from which the  
samples originate, and different shapes denote different cat-  
egories. Before applying our method, it is evident that  
the categories were difficult to distinguish (points of dif-  
ferent shapes are mixed together), and samples from dif-  
ferent domains were clearly separated (points of the same  
shape but different colors are distinctly divided). This indi-  
cates that the features extracted by the model were domain-  
dependent. However, after applying our method, we ob-  
served an improvement in classification results (points of  
different shapes are separated), and the model extracted

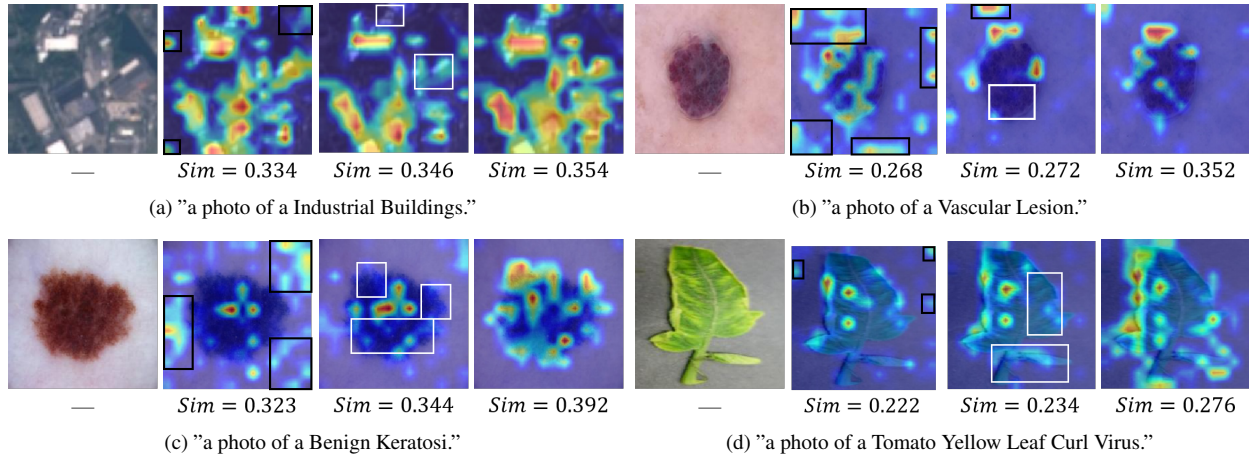

Figure 4. The attention maps of the three models. From left to right: the original image, the baseline result, baseline + remove (see Figure 2(c) in the main text) result, and the result of ours. Black boxes highlight areas of incorrect attention, while white boxes highlight areas of missing attention.  $Sim$  represents the cosine similarity between the image features and the text features. A higher similarity indicates better alignment.

233 consistent features for samples from the same category  
 234 but different domains (points of the same shape but dif-  
 235 ferent colors are nearly indistinguishable). This suggests  
 236 that our method enables the model to extract more domain-  
 237 independent features.

### 238 F.3. Reclaiming the Lost Layer Information

239 We illustrate the specific changes in the model before and  
 240 after leveraging the information from the lost layer through  
 241 several examples. Figure 4 shows, from left to right: (1)  
 242 the original image; (2) when using the full text encoder,  
 243 the model incorrectly focuses on non-semantic parts (high-  
 244 lighted by the black box); (3) after removing the lost layer,  
 245 these incorrect focuses disappear, but some effective atten-  
 246 tion areas (highlighted by the white box) are lost; (4) our  
 247 method eliminates the incorrect focuses while preserving  
 248 the effective attention areas, achieving an appropriate focus  
 249 range and better feature alignment.

### 250 G. Extended Results on CDFSL Task

251 Table 5 is an extended version of Table 2 in the main  
 252 text. It includes the performance of various models on  
 253 four CDFSL datasets under different settings. These set-  
 254 tings involve different backbones (CLIP [32], SigLIP2 [39],  
 255 and PE-Core [3]), the use of a source dataset (Source),  
 256 and whether fine-tuning on the target domain is applied  
 257 (FT). Specifically, the methods include ATA [43], AFA [16],  
 258 wave-SAN [8], StyleAdv [9], StyleAdv-FT (fine-tuned  
 259 StyleAdv), DARA [58], PMF [15], FLoR [67], CD-  
 260 CLS [68], AttnTemp [66], VDB [52], IM-DCL [47], Step-  
 261 STP [48], CoOp [62], Tip-Adapter [56], AMU-Tuning [36],  
 262 LP++ [17], LDC [25], Maple [18], and CLIP-LoRA [53],  
 263 which are introduced as our competitors.

### H. Few Shot Learning Results on Meta-dataset

264 We further demonstrate the effectiveness of our method on  
 265 the Meta-dataset [38]. We compare our method with the  
 266 most recent CLIP-based methods and present the results in  
 267 Table 6. For results on datasets ISIC, EuroSAT, ChestX,  
 268 and CropDisease, please refer to Table 5. This comparison  
 269 includes both fully fine-tuned methods [35, 45] and prompt-  
 270 tuning methods [4, 18] of CLIP. As shown in Table 6, our  
 271 method, when added to CLIP-LoRA [53], effectively en-  
 272 hances its performance, achieving an improvement of ap-  
 273 proximately 3 points in the 1-shot scenario. Additionally,  
 274 CLIP-LoRA + OURS achieves the highest average perfor-  
 275 mance to date in both 1-shot and 5-shot tasks.  
 276

### I. Detailed Implementation Details.

278 We adopt the ViT-Base/16 network as the backbone, uti-  
 279 lizing parameters pre-trained by CLIP [32], SigLIP2 [39]  
 280 and PE-Core [3]. In every layer of the visual branch, we  
 281 incorporate the LoRA [14] structure for fine-tuning. For  
 282 each layer’s LoRA component, we set  $r = 16$  and  $\alpha = 8$ .  
 283 Following the methodology in [48], we perform data aug-  
 284 mentation on the support samples in each episode. Sub-  
 285 sequently, we train the model for 250 epochs, using two  
 286 hyperparameters,  $\beta$  and  $\lambda$  (refer to Method). And for all  
 287 settings, we fix  $\beta = 7$  and  $\lambda = 50$ . We evaluate each model  
 288 using 15 query samples per class, randomly selecting 800  
 289 episodes, and report the results (in percentage) with a 95%  
 290 confidence interval. All training and testing procedures are  
 291 conducted on a single NVIDIA GeForce RTX 3090.

Table 5. The accuracy(%) of four target domain datasets under 5-way 1-shot and 5-way 5-shot tasks. The use of a source dataset (Source), and whether fine-tuning on the target domain is applied (FT)

| Task         | Method                         | backbone    | Source | FT | ISIC              | EuroSAT           | CropDisease       | ChestX            | Avg          |
|--------------|--------------------------------|-------------|--------|----|-------------------|-------------------|-------------------|-------------------|--------------|
| 5-way 1-shot | ATA [43]                       | RN10        | Y      | -  | 33.21±0.40        | 61.35±0.50        | 67.47±0.50        | 22.10±0.20        | 46.03        |
|              | AFA [16]                       | RN10        | Y      | -  | 33.21±0.30        | 63.12±0.50        | 67.61±0.50        | 22.92±0.20        | 46.72        |
|              | wave-SAN [8]                   | RN10        | Y      | -  | 33.35±0.71        | 69.64±1.09        | 70.80±1.06        | 22.93±0.49        | 49.18        |
|              | StyleAdv [9]                   | RN10        | Y      | -  | 33.96±0.57        | 70.94±0.82        | 74.13±0.78        | 22.64±0.35        | 50.42        |
|              | ATA-FT [43]                    | RN10        | Y      | Y  | 34.94±0.40        | 68.62±0.50        | 75.41±0.50        | 22.15±0.20        | 50.28        |
|              | DARA [58]                      | RN10        | Y      | Y  | 36.42±0.64        | 67.42±0.80        | 80.74±0.76        | 22.92±0.40        | 51.88        |
|              | StyleAdv-FT [9]                | RN10        | Y      | Y  | 35.76±0.52        | 72.92±0.75        | 80.69±0.28        | 22.64±0.35        | 53.00        |
|              | PMF [15]                       | ViT/DINO    | Y      | Y  | 30.36±0.36        | 70.74±0.63        | 80.79±0.62        | 21.73±0.30        | 50.91        |
|              | StyleAdv-FT [9]                | ViT/DINO    | Y      | Y  | 33.99±0.46        | 74.93±0.58        | 84.11±0.57        | 22.92±0.32        | 53.99        |
|              | FLoR [67]                      | ViT/DINO    | Y      | Y  | 35.49             | 73.09             | 83.55             | 23.26             | 53.85        |
|              | CD-CLS [68]                    | ViT/DINO    | Y      | Y  | 35.56             | 74.97             | 84.53             | 23.39             | 54.62        |
|              | AttnTemp [66]                  | ViT/DINO    | Y      | Y  | 38.05             | 75.09             | 84.78             | 23.63             | 55.39        |
|              | FN+VDB [52]                    | RN18        | -      | Y  | 32.96±0.57        | 69.67±0.80        | 79.68±0.74        | 22.64±0.41        | 51.24        |
|              | IM-DCL [47]                    | RN10        | -      | Y  | 38.13±0.57        | 77.14±0.71        | 84.37±0.99        | 23.98±0.79        | 55.91        |
|              | StepSTP [48]                   | ViT/CLIP    | -      | Y  | 32.97±0.27        | 70.01±0.21        | 84.84±0.72        | <b>22.84±0.95</b> | 52.68        |
|              | CoOp [62]                      | ViT/CLIP    | -      | Y  | 32.86±0.47        | 72.08±0.66        | 80.50±0.74        | 21.65±0.32        | 51.77        |
|              | Tip-Adapter [56]               | ViT/CLIP    | -      | Y  | 32.68±0.37        | 75.44±0.51        | 77.15±0.66        | 22.24±0.26        | 51.87        |
|              | PromptSRC [19]                 | ViT/CLIP    | -      | Y  | 31.86±0.57        | 73.44±0.71        | 76.15±0.89        | 21.16±0.36        | 50.65        |
|              | PDA [1]                        | ViT/CLIP    | -      | Y  | 31.45±0.44        | 69.68±0.71        | 79.20±0.83        | 20.66±0.28        | 50.25        |
|              | AMU-Tuning [36]                | ViT/CLIP    | -      | Y  | 32.29±0.67        | 72.24±0.71        | 80.20±0.86        | 21.56±0.36        | 51.57        |
|              | LP++ [17]                      | ViT/CLIP    | -      | Y  | 33.63±0.41        | 73.05±0.55        | 81.84±0.66        | 21.72±0.42        | 52.56        |
|              | LDC [25]                       | ViT/CLIP    | -      | Y  | 33.72±0.46        | 74.19±0.52        | 83.77±0.81        | 22.12±0.36        | 53.45        |
|              | Maple [18]                     | ViT/CLIP    | -      | Y  | 33.38±0.49        | 76.05±0.63        | 81.78±0.72        | 21.09±0.31        | 53.07        |
|              | <b>Maple + OURS</b>            | ViT/CLIP    | -      | Y  | <b>34.06±0.53</b> | <b>82.25±0.75</b> | <b>82.66±0.72</b> | <b>21.64±0.34</b> | <b>55.15</b> |
|              | CLIP-LoRA-Vision [53]          | ViT/CLIP    | -      | Y  | 36.40±0.42        | 81.72±0.52        | 84.22±0.62        | 21.86±0.32        | 55.97        |
|              | <b>CLIP-LoRA-Vision + OURS</b> | ViT/CLIP    | -      | Y  | <b>38.20±0.45</b> | <b>85.01±0.41</b> | <b>87.00±0.53</b> | <b>22.70±0.33</b> | <b>58.23</b> |
|              | SigLIP2-LoRA [39]              | ViT/SigLip2 | -      | Y  | 33.47             | 74.16             | 87.50             | 21.44             | 54.14        |
|              | <b>SigLIP2-LoRA + OURS</b>     | ViT/SigLip2 | -      | Y  | <b>35.34</b>      | <b>76.10</b>      | <b>89.72</b>      | <b>22.00</b>      | <b>55.79</b> |
|              | PE-Core-LoRA [3]               | ViT/PE-Core | -      | Y  | 40.89             | 84.49             | 91.75             | 22.02             | 59.78        |
|              | <b>PE-Core-LoRA + OURS</b>     | ViT/PE-Core | -      | Y  | <b>42.20</b>      | <b>86.16</b>      | <b>92.61</b>      | <b>23.04</b>      | <b>61.00</b> |
| 5-way 5-shot | ATA [43]                       | RN10        | Y      | -  | 44.91±0.40        | 83.75±0.40        | 90.59±0.30        | 24.32±0.40        | 60.89        |
|              | AFA [16]                       | RN10        | Y      | -  | 46.01±0.40        | 85.58±0.40        | 88.06±0.30        | 25.02±0.20        | 61.17        |
|              | wave-SAN [8]                   | RN10        | Y      | -  | 44.93±0.67        | 85.22±0.71        | 89.70±0.64        | 25.63±0.49        | 61.37        |
|              | StyleAdv [9]                   | RN10        | Y      | -  | 45.77±0.51        | 86.58±0.54        | 93.65±0.39        | 26.07±0.37        | 63.02        |
|              | ATA-FT [43]                    | RN10        | Y      | Y  | 49.79±0.40        | 89.64±0.30        | 95.44±0.20        | 25.08±0.20        | 64.99        |
|              | DARA [58]                      | RN10        | Y      | Y  | 56.28±0.66        | 85.84±0.54        | 95.32±0.34        | 27.54±0.42        | 66.25        |
|              | StyleAdv-FT [9]                | RN10        | Y      | Y  | 53.05±0.54        | 91.64±0.43        | 96.51±0.28        | 26.24±0.35        | 66.86        |
|              | PMF [15]                       | ViT/DINO    | Y      | Y  | 50.12             | 85.98             | 92.96             | 27.27             | 64.08        |
|              | StyleAdv-FT [9]                | ViT/DINO    | Y      | Y  | 51.23±0.51        | 90.12±0.33        | 95.99±0.27        | 26.97±0.33        | 66.08        |
|              | FLoR [67]                      | ViT/DINO    | Y      | Y  | 53.06             | 90.75             | 96.47             | 27.02             | 66.83        |
|              | CD-CLS [68]                    | ViT/DINO    | Y      | Y  | 54.69             | 91.53             | 96.27             | 27.66             | 67.54        |
|              | AttnTemp [66]                  | ViT/DINO    | Y      | Y  | 54.91             | 90.82             | 96.66             | 28.03             | 67.61        |
|              | FN+VDB [52]                    | RN18        | -      | Y  | 47.48±0.59        | 87.31±0.50        | 94.63±0.37        | 25.55±0.43        | 64.74        |
|              | IM-DCL [47]                    | RN10        | -      | Y  | 52.74±0.69        | 89.47±0.42        | 95.73±0.38        | 28.93±0.41        | 66.72        |
|              | StepSTP [48]                   | ViT/CLIP    | -      | Y  | 52.12±0.36        | 89.40±1.05        | 96.01±0.88        | 26.36±0.97        | 65.97        |
|              | CoOp [62]                      | ViT/CLIP    | -      | Y  | 45.78±0.75        | 85.88±0.49        | 93.31±0.57        | 23.35±0.50        | 62.08        |
|              | Tip-Adapter [56]               | ViT/CLIP    | -      | Y  | 46.96±0.59        | 87.24±0.33        | 94.19±0.39        | 24.07±0.44        | 63.12        |
|              | PromptSRC [19]                 | ViT/CLIP    | -      | Y  | 46.09±0.48        | 86.54±0.49        | 89.97±0.41        | 23.51±0.47        | 61.52        |
|              | PDA [1]                        | ViT/CLIP    | -      | Y  | 45.19±0.62        | 86.21±0.44        | 92.67±0.39        | 21.87±0.33        | 61.48        |
|              | AMU-Tuning [36]                | ViT/CLIP    | -      | Y  | 44.60±0.62        | 88.47±0.39        | 94.26±0.52        | 23.34±0.41        | 62.66        |
|              | LP++ [17]                      | ViT/CLIP    | -      | Y  | 48.49±0.44        | 87.48±0.42        | 94.47±0.38        | 23.89±0.29        | 63.58        |
|              | LDC [25]                       | ViT/CLIP    | -      | Y  | 49.70±0.33        | 90.82±0.22        | 96.71±0.34        | 25.89±0.21        | 65.78        |
|              | Maple [18]                     | ViT/CLIP    | -      | Y  | 48.35±0.75        | 89.04±0.52        | 93.50±0.54        | 22.96±0.50        | 63.46        |
|              | <b>Maple + OURS</b>            | ViT/CLIP    | -      | Y  | <b>49.81±0.78</b> | <b>92.24±0.42</b> | <b>94.62±0.53</b> | <b>24.04±0.50</b> | <b>65.18</b> |
|              | CLIP-LoRA-Vision [53]          | ViT/CLIP    | -      | Y  | 52.22±0.71        | 93.31±0.47        | 95.88±0.42        | 24.61±0.47        | 66.50        |
|              | <b>CLIP-LoRA-Vision + OURS</b> | ViT/CLIP    | -      | Y  | <b>56.20±0.41</b> | <b>94.58±0.31</b> | <b>97.21±0.35</b> | <b>26.42±0.31</b> | <b>68.57</b> |
|              | SigLIP2-LoRA [39]              | ViT/SigLip2 | -      | Y  | 51.79             | 91.39             | 96.43             | 24.24             | 65.96        |
|              | <b>SigLIP2-LoRA + OURS</b>     | ViT/SigLip2 | -      | Y  | <b>55.11</b>      | <b>92.70</b>      | <b>97.63</b>      | <b>25.54</b>      | <b>67.75</b> |
|              | PE-Core-LoRA [3]               | ViT/PE-Core | -      | Y  | 58.81             | 94.07             | 97.25             | 24.44             | 68.64        |
|              | <b>PE-Core-LoRA + OURS</b>     | ViT/PE-Core | -      | Y  | <b>60.03</b>      | <b>94.67</b>      | <b>98.36</b>      | <b>27.05</b>      | <b>70.05</b> |

Table 6. Detailed results for meta-dataset [38] with the ViT-B/16 as visual backbone. Highest value is high lighted in bold.

| Shots  | Method           | Omniglot     | Traffic Signs | MSCOCO       | Textures     | CUB          | Quickdraw    | Aircraft     | VGG Flower   | Fungi        | Mini-test    | Average      |
|--------|------------------|--------------|---------------|--------------|--------------|--------------|--------------|--------------|--------------|--------------|--------------|--------------|
| 1-shot | WiSE-FT          | 83.56        | 60.84         | 67.28        | 63.55        | 81.16        | 62.54        | 62.64        | 73.14        | 59.10        | 93.55        | 70.73        |
|        | FD-Align         | 83.81        | 57.32         | 65.91        | 66.05        | 82.88        | 64.49        | 62.90        | 79.87        | 57.05        | 95.04        | 71.53        |
|        | MaPLe            | 77.82        | 56.45         | 68.55        | 66.05        | 94.08        | 72.54        | 79.76        | 98.24        | 55.85        | 97.17        | 76.65        |
|        | PromptMargin     | 87.01        | 67.24         | 72.86        | 69.25        | <b>96.97</b> | 74.84        | 83.94        | <b>98.43</b> | 61.16        | <b>99.17</b> | 81.08        |
|        | CLIP-LoRA        | 90.29        | 78.45         | 83.45        | 84.75        | 93.90        | 76.08        | 80.83        | 97.57        | 64.59        | 98.97        | 84.88        |
|        | CLIP-LoRA + OURS | <b>95.01</b> | <b>85.40</b>  | <b>83.89</b> | <b>86.27</b> | <u>95.97</u> | <b>82.37</b> | <b>84.02</b> | 97.94        | <b>66.68</b> | <u>98.99</u> | <b>87.64</b> |
| 5-shot | WiSE-FT          | 95.26        | 78.11         | 81.08        | 83.31        | 93.41        | 82.78        | 77.66        | 99.06        | 73.28        | 98.44        | 86.24        |
|        | FD-Align         | 94.81        | 73.39         | 81.37        | 83.60        | 93.87        | 82.78        | 78.21        | 98.95        | 73.69        | 98.52        | 85.91        |
|        | Maple            | 96.23        | 85.21         | 75.13        | 88.45        | 97.65        | 85.08        | 87.56        | 99.23        | 79.69        | <b>99.39</b> | 89.06        |
|        | PromptMargin     | 96.37        | 87.55         | 76.68        | 88.71        | 97.12        | 85.21        | 86.53        | 99.27        | 80.91        | 99.19        | 89.75        |
|        | CLIP-LoRA        | 98.78        | 94.50         | 86.61        | 90.66        | 96.60        | 89.33        | 87.44        | 99.29        | 82.68        | 99.10        | 92.49        |
|        | CLIP-LoRA + OURS | <b>99.40</b> | <b>96.73</b>  | <b>86.67</b> | <b>91.06</b> | <b>97.83</b> | <b>90.11</b> | <b>87.63</b> | <b>99.51</b> | <b>84.18</b> | <u>99.20</u> | <b>93.22</b> |

292

## J. Detailed Related Work

293

### J.1. Source-Free Cross-domain Few shot Learning

294

Cross-Domain Few-Shot Learning (CDFSL) aims to train a model on a source domain that can generalize effectively to a target domain with limited examples. Existing methods are typically categorized into two types: meta-learning-based approaches [8, 12, 16, 43] and transfer learning-based approaches [12, 28, 60, 66–68]. Source-Free Cross-Domain Few-Shot Learning (SF-CDFSL) introduces a stronger constraint by making source domain data inaccessible. Current SF-CDFSL methods [48, 52, 64] primarily rely on large models, such as CLIP [32], leveraging their prior knowledge for classification in the target domain. However, no prior work has identified or analyzed the issue of the lost layer when using CLIP for CDFSL tasks.

307

### J.2. Parameter-Efficient Fine-Tuning

308

A crucial area of research is the efficient application of Vision-Language Models (VLMs) to downstream tasks. A widely used approach to achieve this is parameter-efficient fine-tuning (PEFT), which involves utilizing only a small number of samples from the target task. PEFT focuses on adjusting a limited subset of the VLM’s parameters, enabling the model to adapt to diverse applications without altering all pre-trained parameters. There are three main categories of PEFT methods: prompt learning, adapters, and LoRA (along with its variants). Prompt learning involves converting fixed templates into learnable parameters, as demonstrated in works like CoOp [62], CoCoOp [61], MaPLe [18], PLOT [6], ProGrad [63], PromptSRC [20], KgCoOp [50], PCB [2], DynaPrompt [46], TCP [51], and ATPrompt [27]. Moreover, Customized Ensemble [29] improves performance by combining outputs from multiple models, while PromptKD [26] explores knowledge distillation within prompt learning. Adapter-based methods, such as CLIP-Adapter [10], Tip-Adapter [57], LP++ [17], AMU-Tuning [36], LatHAdapter [59], MMA [49] and LDC [25]. Low-Rank Adaptation (LoRA) [14, 53] fine-tunes the model by adding learnable low-rank matrices while keeping the original parameters fixed. The new

weights can be merged with the original ones, and LoRA does not add extra inference time. Various studies have extended LoRA by adapting the rank for each matrix [40, 55], improving its performance [5, 21, 65], or reducing memory usage through quantization [7, 33]

### J.3. Layer Redundancy

Research related to layer redundancy, such as [11, 23] in LLMs, differs from ours. We focus on VLMs, such as CLIP [32], and examine this phenomenon in the SF-CDFSL task setting. Unlike previous studies [24, 31, 37, 44] which focus on in-domain scenarios, consider these layers as redundant, and employ a removal strategy, we study the SF-CDFSL problem on VLM and find the information in these layers actually beneficial for SF-CDFSL tasks, instead of removing layers [23, 31, 37], we reclaim the lost layer and demonstrate that this reclamation is a superior strategy compared to removal. Our work provides a new perspective for analyzing similar issue.

## K. Broader Impact

In this paper, we observe the Lost Layer in CLIP under cross-domain scenarios and reveal that the information within the Lost Layer is actually beneficial for SF-CDFSL tasks. However, changes in the visual domain lead to the under-utilization of this information. We then propose the VtT model to reuse this information. Extensive experiments validate our rationale and effectiveness. Our research is crucial for future studies on fine-tuning VLM models in cross-domain scenarios. From the perspective of shortcut learning, it highlights the impact of the Lost Layer and discusses how to effectively utilize it. While our method has been evaluated across four distinct target domains, offering a promising initial assessment of its cross-domain applicability, the diversity of these domains may not fully capture all potential real-world scenarios. Future work will focus on expanding our evaluations to include a broader range of target domains to better understand the method’s performance in diverse real-world contexts.

331

332

333

334

335

336

337

338

339

340

341

342

343

344

345

346

347

348

349

350

351

352

353

354

355

356

357

358

359

360

361

362

363

364

365

366

367

368

**References**

369

370

371

372

373

374

375

376

377

378

379

380

381

382

383

384

385

386

387

388

389

390

391

392

393

394

395

396

397

398

399

400

401

402

403

404

405

406

407

408

409

410

411

412

413

414

415

416

417

418

419

420

421

422

423

424

- [1] Shuanghao Bai, Min Zhang, Wanqi Zhou, Siteng Huang, Zhirong Luan, Donglin Wang, and Badong Chen. Prompt-based distribution alignment for unsupervised domain adaptation. In *Proceedings of the AAAI conference on artificial intelligence*, pages 729–737, 2024. 6
- [2] Jihwan Bang, Sumyeong Ahn, and Jae-Gil Lee. Active prompt learning in vision language models. In *Proceedings of the IEEE/CVF Conference on Computer Vision and Pattern Recognition*, pages 27004–27014, 2024. 7
- [3] Daniel Bolya, Po-Yao Huang, Peize Sun, Jang Hyun Cho, Andrea Madotto, Chen Wei, Tengyu Ma, Jiale Zhi, Jathushan Rajasegaran, Hanoona Rasheed, et al. Perception encoder: The best visual embeddings are not at the output of the network. *arXiv preprint arXiv:2504.13181*, 2025. 5, 6
- [4] Debarshi Brahma, Anuska Roy, and Soma Biswas. Prompt tuning vision language models with margin regularizer for few-shot learning under distribution shifts. *arXiv preprint arXiv:2505.15506*, 2025. 5
- [5] Arnav Chavan, Zhuang Liu, Deepak Gupta, Eric Xing, and Zhiqiang Shen. One-for-all: Generalized lora for parameter-efficient fine-tuning. *arXiv preprint arXiv:2306.07967*, 2023. 7
- [6] Guangyi Chen, Weiran Yao, Xiangchen Song, Xinyue Li, Yongming Rao, and Kun Zhang. Plot: Prompt learning with optimal transport for vision-language models. *arXiv preprint arXiv:2210.01253*, 2022. 7
- [7] Tim Dettmers, Artidoro Pagnoni, Ari Holtzman, and Luke Zettlemoyer. Qlora: Efficient finetuning of quantized llms. *Advances in Neural Information Processing Systems*, 36, 2024. 7
- [8] Yuqian Fu, Yu Xie, Yanwei Fu, Jingjing Chen, and Yu-Gang Jiang. Wave-san: Wavelet based style augmentation network for cross-domain few-shot learning. *arXiv preprint arXiv:2203.07656*, 2022. 5, 6, 7
- [9] Yuqian Fu, Yu Xie, Yanwei Fu, and Yu-Gang Jiang. Styleadv: Meta style adversarial training for cross-domain few-shot learning. In *Proceedings of the IEEE/CVF conference on computer vision and pattern recognition*, pages 24575–24584, 2023. 5, 6
- [10] Peng Gao, Shijie Geng, Renrui Zhang, Teli Ma, Rongyao Fang, Yongfeng Zhang, Hongsheng Li, and Yu Qiao. Clip-adapter: Better vision-language models with feature adapters. *International Journal of Computer Vision*, 132(2): 581–595, 2024. 7
- [11] Ramón Calvo González, Daniele Paliotta, Matteo Pagliarini, Martin Jaggi, and François Fleuret. Leveraging the true depth of llms. *arXiv preprint arXiv:2502.02790*, 2025. 7
- [12] Yunhui Guo, Noel C Codella, Leonid Karlinsky, James V Codella, John R Smith, Kate Saenko, Tajana Rosing, and Rogerio Feris. A broader study of cross-domain few-shot learning. In *Computer vision—ECCV 2020: 16th European conference, glasgow, UK, August 23–28, 2020, proceedings, part XXVII 16*, pages 124–141. Springer, 2020. 7
- [13] Dan Hendrycks, Steven Basart, Norman Mu, Saurav Kadavath, Frank Wang, Evan Dorundo, Rahul Desai, Tyler Zhu, Samyak Parajuli, Mike Guo, Dawn Song, Jacob Steinhardt, and Justin Gilmer. The many faces of robustness: A critical analysis of out-of-distribution generalization. *ICCV*, 2021. 4
- [14] Edward J Hu, Yelong Shen, Phillip Wallis, Zeyuan Allen-Zhu, Yuanzhi Li, Shean Wang, Lu Wang, and Weizhu Chen. Lora: Low-rank adaptation of large language models. *arXiv preprint arXiv:2106.09685*, 2021. 5, 7
- [15] Shell Xu Hu, Da Li, Jan Stühmer, Minyoung Kim, and Timothy M Hospedales. Pushing the limits of simple pipelines for few-shot learning: External data and fine-tuning make a difference. In *Proceedings of the IEEE/CVF Conference on Computer Vision and Pattern Recognition*, pages 9068–9077, 2022. 5, 6
- [16] Yanxu Hu and Andy J Ma. Adversarial feature augmentation for cross-domain few-shot classification. In *European conference on computer vision*, pages 20–37. Springer, 2022. 5, 6, 7
- [17] Yunshi Huang, Fereshteh Shakeri, Jose Dolz, Malik Boudiaf, Houda Bahig, and Ismail Ben Ayed. Lp++: A surprisingly strong linear probe for few-shot clip. In *Proceedings of the IEEE/CVF Conference on Computer Vision and Pattern Recognition*, pages 23773–23782, 2024. 5, 6, 7
- [18] Muhammad Uzair Khattak, Hanoona Rasheed, Muhammad Maaz, Salman Khan, and Fahad Shahbaz Khan. Maple: Multi-modal prompt learning. In *Proceedings of the IEEE/CVF Conference on Computer Vision and Pattern Recognition*, pages 19113–19122, 2023. 5, 6, 7
- [19] Muhammad Uzair Khattak, Syed Talal Wasim, Muzammal Naseer, Salman Khan, Ming-Hsuan Yang, and Fahad Shahbaz Khan. Self-regulating prompts: Foundational model adaptation without forgetting. In *Proceedings of the IEEE/CVF International Conference on Computer Vision (ICCV)*, pages 15190–15200, 2023. 6
- [20] Muhammad Uzair Khattak, Syed Talal Wasim, Muzammal Naseer, Salman Khan, Ming-Hsuan Yang, and Fahad Shahbaz Khan. Self-regulating prompts: Foundational model adaptation without forgetting. In *Proceedings of the IEEE/CVF International Conference on Computer Vision*, pages 15190–15200, 2023. 7
- [21] Sanghyeon Kim, Hyunmo Yang, Yunghyun Kim, Youngjoon Hong, and Eunbyung Park. Hydra: Multi-head low-rank adaptation for parameter efficient fine-tuning. *Neural Networks*, page 106414, 2024. 7
- [22] Simon Kornblith, Mohammad Norouzi, Honglak Lee, and Geoffrey Hinton. Similarity of neural network representations revisited. In *International conference on machine learning*, pages 3519–3529. PMIR, 2019. 2
- [23] Vedang Lad, Wes Gurnee, and Max Tegmark. The remarkable robustness of llms: Stages of inference?, 2024. URL <https://arxiv.org/abs/2406.19384>. 7
- [24] Tim Lawson and Laurence Aitchison. Learning to skip the middle layers of transformers. *arXiv preprint arXiv:2506.21103*, 2025. 7
- [25] Shuo Li, Fang Liu, Zehua Hao, Xinyi Wang, Lingling Li, Xu Liu, Puhua Chen, and Wenping Ma. Logits deconfusion with clip for few-shot learning. In *Proceedings of the Computer Vision and Pattern Recognition Conference*, pages 25411–25421, 2025. 5, 6, 7

425

426

427

428

429

430

431

432

433

434

435

436

437

438

439

440

441

442

443

444

445

446

447

448

449

450

451

452

453

454

455

456

457

458

459

460

461

462

463

464

465

466

467

468

469

470

471

472

473

474

475

476

477

478

479

480

481

- 482 [26] Zheng Li, Xiang Li, Xinyi Fu, Xin Zhang, Weiqiang Wang,  
483 Shuo Chen, and Jian Yang. Promptkd: Unsupervised prompt  
484 distillation for vision-language models. In *Proceedings of  
485 the IEEE/CVF Conference on Computer Vision and Pattern  
486 Recognition*, pages 26617–26626, 2024. 7
- 487 [27] Zheng Li, Yibing Song, Ming-Ming Cheng, Xiang Li, and  
488 Jian Yang. Advancing textual prompt learning with anchored  
489 attributes. In *Proceedings of the IEEE/CVF International  
490 Conference on Computer Vision*, pages 3618–3627, 2025. 7
- 491 [28] Hanwen Liang, Qiong Zhang, Peng Dai, and Juwei Lu.  
492 Boosting the generalization capability in cross-domain few-  
493 shot learning via noise-enhanced supervised autoencoder. In  
494 *Proceedings of the IEEE/CVF international conference on  
495 computer vision*, pages 9424–9434, 2021. 7
- 496 [29] Zhihe Lu, Jiawang Bai, Xin Li, Zeyu Xiao, and Xin-  
497 chao Wang. Beyond sole strength: Customized ensem-  
498 bles for generalized vision-language models. *arXiv preprint  
499 arXiv:2311.17091*, 2023. 7
- 500 [30] Laurens van der Maaten and Geoffrey Hinton. Visualizing  
501 data using t-sne. *Journal of machine learning research*, 9  
502 (Nov):2579–2605, 2008. 4
- 503 [31] Xin Men, Mingyu Xu, Qingyu Zhang, Bingning Wang,  
504 Hongyu Lin, Yaojie Lu, Xianpei Han, and Weipeng Chen.  
505 Shortgpt: Layers in large language models are more redun-  
506 dant than you expect. *arXiv preprint arXiv:2403.03853*,  
507 2024. 7
- 508 [32] Alec Radford, Jong Wook Kim, Chris Hallacy, Aditya  
509 Ramesh, Gabriel Goh, Sandhini Agarwal, Girish Sastry,  
510 Amanda Askell, Pamela Mishkin, Jack Clark, et al. Learning  
511 transferable visual models from natural language supervi-  
512 sion. In *International conference on machine learning*, pages  
513 8748–8763. PmLR, 2021. 5, 7
- 514 [33] Hossein Rajabzadeh, Mojtaba Valipour, Tianshu Zhu,  
515 Marzieh Tahaei, Hyock Ju Kwon, Ali Ghodsi, Boxing Chen,  
516 and Mehdi Rezagholizadeh. Qdylora: Quantized dynamic  
517 low-rank adaptation for efficient large language model tun-  
518 ing. *arXiv preprint arXiv:2402.10462*, 2024. 7
- 519 [34] Xingjian Shi, Zhouong Chen, Hao Wang, Dit-Yan Yeung,  
520 Wai-Kin Wong, and Wang-chun Woo. Convolutional lstm  
521 network: A machine learning approach for precipitation  
522 nowcasting. *Advances in neural information processing sys-*  
523 *tems*, 28, 2015. 3
- 524 [35] Kun Song, Huimin Ma, Bochao Zou, Huishuai Zhang, and  
525 Weiran Huang. Fd-align: Feature discrimination align-  
526 ment for fine-tuning pre-trained models in few-shot learn-  
527 ing. *Advances in Neural Information Processing Systems*,  
528 36:43579–43592, 2023. 5
- 529 [36] Yuwei Tang, Zhenyi Lin, Qilong Wang, Pengfei Zhu, and  
530 Qinghua Hu. Amu-tuning: Effective logit bias for clip-based  
531 few-shot learning. In *Proceedings of the IEEE/CVF Con-*  
532 *ference on Computer Vision and Pattern Recognition*, pages  
533 23323–23333, 2024. 5, 6, 7
- 534 [37] Jintao Tong, Wenwei Jin, Pengda Qin, Anqi Li, Yixiong Zou,  
535 Yuhong Li, Yuhua Li, and Ruixuan Li. Flowcut: Rethink-  
536 ing redundancy via information flow for efficient vision-  
537 language models. *arXiv preprint arXiv:2505.19536*, 2025.  
538 7
- [38] Eleni Triantafyllou, Tyler Zhu, Vincent Dumoulin, Pascal  
Lamblin, Utku Evci, Kelvin Xu, Ross Goroshin, Carles  
Gelada, Kevin Swersky, Pierre-Antoine Manzagol, et al.  
Meta-dataset: A dataset of datasets for learning to learn from  
few examples. *arXiv preprint arXiv:1903.03096*, 2019. 5, 7
- [39] Michael Tschannen, Alexey Gritsenko, Xiao Wang, Muham-  
ammad Ferjad Naeem, Ibrahim Alabdulmohsin, Nikhil  
Parthasarathy, Talfan Evans, Lucas Beyer, Ye Xia, Basil  
Mustafa, et al. Siglip 2: Multilingual vision-language en-  
coders with improved semantic understanding, localization,  
and dense features. *arXiv preprint arXiv:2502.14786*, 2025.  
5, 6
- [40] Mojtaba Valipour, Mehdi Rezagholizadeh, Ivan Kobyzev,  
and Ali Ghodsi. Dylora: Parameter efficient tuning of pre-  
trained models using dynamic search-free low-rank adapta-  
tion. *arXiv preprint arXiv:2210.07558*, 2022. 7
- [41] Ashish Vaswani, Noam Shazeer, Niki Parmar, Jakob Uszko-  
reit, Llion Jones, Aidan N Gomez, Łukasz Kaiser, and Illia  
Polosukhin. Attention is all you need. *Advances in neural  
information processing systems*, 30, 2017. 3
- [42] Hemanth Venkateswara, Jose Eusebio, Shayok Chakraborty,  
and Sethuraman Panchanathan. Deep hashing network for  
unsupervised domain adaptation. In *Proceedings of the IEEE  
Conference on Computer Vision and Pattern Recognition*,  
pages 5018–5027, 2017. 2
- [43] Haoqing Wang and Zhi-Hong Deng. Cross-domain few-  
shot classification via adversarial task augmentation. *arXiv  
preprint arXiv:2104.14385*, 2021. 5, 6, 7
- [44] Yizhou Wang, Song Mao, Yang Chen, Yufan Shen, Yin-  
qiao Yan, Pinlong Cai, Ding Wang, Guohang Yan, Zhi Yu,  
Xuming Hu, et al. Investigating redundancy in multimodal  
large language models with multiple vision encoders. *arXiv  
preprint arXiv:2507.03262*, 2025. 7
- [45] Mitchell Wortsman, Gabriel Ilharco, Jong Wook Kim,  
Mike Li, Simon Kornblith, Rebecca Roelofs, Raphael Gon-  
tijo Lopes, Hannaneh Hajishirzi, Ali Farhadi, Hongseok  
Namkoong, et al. Robust fine-tuning of zero-shot models.  
In *Proceedings of the IEEE/CVF conference on computer vi-*  
*sion and pattern recognition*, pages 7959–7971, 2022. 5
- [46] Zehao Xiao, Shilin Yan, Jack Hong, Jiayin Cai, Xiaolong  
Jiang, Yao Hu, Jiayi Shen, Qi Wang, and Cees GM Snoek.  
Dynaprompt: Dynamic test-time prompt tuning. In *The  
Thirteenth International Conference on Learning Represent-*  
*tations*, 2025. 7
- [47] Huali Xu, Li Liu, Shuaifeng Zhi, Shaojing Fu, Zhuo Su,  
Ming-Ming Cheng, and Yongxiang Liu. Enhancing infor-  
mation maximization with distance-aware contrastive learn-  
ing for source-free cross-domain few-shot learning. *IEEE  
Transactions on Image Processing*, 2024. 5, 6
- [48] Huali Xu, Yongxiang Liu, Li Liu, Shuaifeng Zhi, Shuzhou  
Sun, Tianpeng Liu, and MingMing Cheng. Step-wise dis-  
tribution alignment guided style prompt tuning for source-  
free cross-domain few-shot learning. *arXiv preprint  
arXiv:2411.10070*, 2024. 5, 6, 7
- [49] Lingxiao Yang, Ru-Yuan Zhang, Yanchen Wang, and Xiao-  
hua Xie. Mma: Multi-modal adapter for vision-language  
models. In *Proceedings of the IEEE/CVF Conference on*

- 596 *Computer Vision and Pattern Recognition (CVPR)*, pages  
597 23826–23837, 2024. 7
- 598 [50] Hantao Yao, Rui Zhang, and Changsheng Xu. Visual-  
599 language prompt tuning with knowledge-guided context op-  
600 timization. In *Proceedings of the IEEE/CVF conference on*  
601 *computer vision and pattern recognition*, pages 6757–6767,  
602 2023. 7
- 603 [51] Hantao Yao, Rui Zhang, and Changsheng Xu. Tc-  
604 p: Textual-based class-aware prompt tuning for visual-language model.  
605 In *Proceedings of the IEEE/CVF Conference on Computer*  
606 *Vision and Pattern Recognition*, pages 23438–23448, 2024.  
607 7
- 608 [52] Moslem Yazdanpanah and Parham Moradi. Visual domain  
609 bridge: A source-free domain adaptation for cross-domain  
610 few-shot learning. In *Proceedings of the IEEE/CVF con-*  
611 *ference on computer vision and pattern recognition*, pages  
612 2868–2877, 2022. 5, 6, 7
- 613 [53] Maxime Zanella and Ismail Ben Ayed. Low-rank few-shot  
614 adaptation of vision-language models. In *Proceedings of*  
615 *the IEEE/CVF Conference on Computer Vision and Pattern*  
616 *Recognition*, pages 1593–1603, 2024. 5, 6, 7
- 617 [54] Wojciech Zaremba, Ilya Sutskever, and Oriol Vinyals.  
618 Recurrent neural network regularization. *arXiv preprint*  
619 *arXiv:1409.2329*, 2014. 3
- 620 [55] Qingru Zhang, Minshuo Chen, Alexander Bukharin, Nikos  
621 Karampatziakis, Pengcheng He, Yu Cheng, Weizhu Chen,  
622 and Tuo Zhao. Adalora: Adaptive budget allocation  
623 for parameter-efficient fine-tuning. *arXiv preprint*  
624 *arXiv:2303.10512*, 2023. 7
- 625 [56] Renrui Zhang, Rongyao Fang, Wei Zhang, Peng Gao,  
626 Kunchang Li, Jifeng Dai, Yu Qiao, and Hongsheng Li.  
627 Tip-adapter: Training-free clip-adapter for better vision-  
628 language modeling. *arXiv preprint arXiv:2111.03930*, 2021.  
629 5, 6
- 630 [57] Renrui Zhang, Wei Zhang, Rongyao Fang, Peng Gao, Kun-  
631 chang Li, Jifeng Dai, Yu Qiao, and Hongsheng Li. Tip-  
632 adapter: Training-free adaption of clip for few-shot classi-  
633 fication. In *European conference on computer vision*, pages  
634 493–510. Springer, 2022. 7
- 635 [58] Yifan Zhao, Tong Zhang, Jia Li, and Yonghong Tian. Dual  
636 adaptive representation alignment for cross-domain few-shot  
637 learning. *IEEE Transactions on Pattern Analysis and Ma-*  
638 *chine Intelligence*, 45(10):11720–11732, 2023. 5, 6
- 639 [59] Yumiao Zhao, Bo Jiang, Yuhe Ding, Xiao Wang, Jin Tang,  
640 and Bin Luo. Fine-grained vlm fine-tuning via latent hier-  
641 archical adapter learning. *arXiv preprint arXiv:2508.11176*,  
642 2025. 7
- 643 [60] Fei Zhou, Peng Wang, Lei Zhang, Wei Wei, and Yanning  
644 Zhang. Revisiting prototypical network for cross domain  
645 few-shot learning. In *Proceedings of the IEEE/CVF con-*  
646 *ference on computer vision and pattern recognition*, pages  
647 20061–20070, 2023. 7
- 648 [61] Kaiyang Zhou, Jingkang Yang, Chen Change Loy, and Ziwei  
649 Liu. Conditional prompt learning for vision-language mod-  
650 els. In *Proceedings of the IEEE/CVF conference on com-*  
651 *puter vision and pattern recognition*, pages 16816–16825,  
652 2022. 7
- [62] Kaiyang Zhou, Jingkang Yang, Chen Change Loy, and Ziwei  
653 Liu. Learning to prompt for vision-language models. *In-*  
654 *ternational Journal of Computer Vision*, 130(9):2337–2348,  
655 2022. 5, 6, 7
- [63] Beier Zhu, Yulei Niu, Yucheng Han, Yue Wu, and Han-  
656 wang Zhang. Prompt-aligned gradient for prompt tuning. In  
657 *Proceedings of the IEEE/CVF International Conference on*  
658 *Computer Vision*, pages 15659–15669, 2023. 7
- [64] Linhai Zhuo, Zheng Wang, Yuqian Fu, and Tianwen Qian.  
660 Prompt as free lunch: Enhancing diversity in source-free  
661 cross-domain few-shot learning through semantic-guided  
662 prompting. *arXiv preprint arXiv:2412.00767*, 2024. 7
- [65] Bojia Zi, Xianbiao Qi, Lingzhi Wang, Jianan Wang, Kam-Fai  
663 Wong, and Lei Zhang. Delta-lora: Fine-tuning high-rank pa-  
664 rameters with the delta of low-rank matrices. *arXiv preprint*  
665 *arXiv:2309.02411*, 2023. 7
- [66] Yixiong Zou, Ran Ma, Yuhua Li, and Ruixuan Li. Atten-  
666 tion temperature matters in vit-based cross-domain few-shot  
667 learning. In *The Thirty-eighth Annual Conference on Neural*  
668 *Information Processing Systems*. 5, 6, 7
- [67] Yixiong Zou, Yicong Liu, Yiman Hu, Yuhua Li, and Ruixuan  
669 Li. Flatten long-range loss landscapes for cross-domain few-  
670 shot learning. In *Proceedings of the IEEE/CVF Conference*  
671 *on Computer Vision and Pattern Recognition*, pages 23575–  
672 23584, 2024. 5, 6
- [68] Yixiong Zou, Shuai Yi, Yuhua Li, and Ruixuan Li. A closer  
673 look at the cls token for cross-domain few-shot learning.  
674 *Advances in Neural Information Processing Systems*, 37:  
675 85523–85545, 2025. 5, 6, 7
- 676  
677  
678  
679  
680  
681
